# Supplementary material
Source: HighWire-hosted journal article supplement (https://www.cmaj.ca/highwire/filestream/75464/field_highwire_adjunct_files/0/190999-res-1-at.pdf)
Supplement: 190999-res-1-at.pdf [file 190999-res-1-at.pdf]

## Appendix 1

### **Supplemental Table 1:** Cohort Selection

| <b>Step</b> | <b>N</b> | <b>Description</b>                                                                                                                                |
|-------------|----------|---------------------------------------------------------------------------------------------------------------------------------------------------|
| 1           | 140,733  | All incident cases of dementia (according to the Dementia algorithm and RAIHC/CCRS) between 1 Jan 2010 and 31 Dec 2012                            |
| 2           | 132,479  | Exclude those with 65>age>105 or missing sex                                                                                                      |
| 5           | 132,432  | Exclude those with a death date before their dementia diagnosis                                                                                   |
| 6           | 130,566  | Exclude those who were ineligible on dementia diagnosis (index) date, those ineligible at any time before death or before end of 5 year follow up |
| 7           | 109,909  | Exclude those with incident LTC admission prior to dementia diagnosis date                                                                        |
| 8           | 109,238  | Exclude those with incident LTC admission on dementia diagnosis date                                                                              |
| 9           | 108,757  | Exclude those with missing rurality and income quintile                                                                                           |



**Supplemental Table 2:** Variables and databases used in the study

| <b>Variable</b>     | <b>Database</b>                                                                                                                                                                                                                      |
|---------------------|--------------------------------------------------------------------------------------------------------------------------------------------------------------------------------------------------------------------------------------|
| Age                 | Registered Persons Database                                                                                                                                                                                                          |
| Sex                 | Registered Persons Database                                                                                                                                                                                                          |
| Death date          | Registered Persons Database                                                                                                                                                                                                          |
| Income Quintile     | Postal codes from Registered Persons Database linked to Statistics Canada Census Data                                                                                                                                                |
| Residential Setting | Registered Persons Database                                                                                                                                                                                                          |
| Primary Care Model  | Client Agency Program Enrolment Database                                                                                                                                                                                             |
| Chronic Conditions  | Refer to Supplemental Table 2                                                                                                                                                                                                        |
| Dementia Diagnosis  | Canadian Institute for Health Information – Discharge Abstract Database, Ontario Health Insurance Plan, Ontario Drug Benefit Database, Resident Assessment Instrument – Home Care database, and the Continuing Care Reporting System |
| All-Cause Mortality | Registered Persons Database                                                                                                                                                                                                          |

**Supplemental Table 3:** Ontario Health Insurance Plan (OHIP), International Classification of Diseases, Version 9 (ICD-9), and Version 10 (ICD-10) diagnostic codes for categorization of comorbidities.

| <b>Condition [reference for validated algorithm]</b>                                                                                                                                                                     | <b>ICD 9 / OHIP</b>                                                                                 | <b>ICD 10</b>                                         | <b>ODB*</b>               |
|--------------------------------------------------------------------------------------------------------------------------------------------------------------------------------------------------------------------------|-----------------------------------------------------------------------------------------------------|-------------------------------------------------------|---------------------------|
| Acute Myocardial Infarction (AMI) [1]                                                                                                                                                                                    | 410                                                                                                 | I21, I22                                              |                           |
| Osteo- and other Arthritis:                                                                                                                                                                                              |                                                                                                     |                                                       |                           |
| (A) Osteoarthritis                                                                                                                                                                                                       | 715                                                                                                 | M15-M19                                               |                           |
| (B) Other Arthritis (includes Synovitis, Fibrositis, Connective tissue disorders, Ankylosing spondylitis, Gout Traumatic arthritis, pyogenic arthritis, Joint derangement, Dupuytren's contracture, Other MSK disorders) | 727, 729, 710, 720, 274, 716, 711,718, 728, 739                                                     | M00-M03, M07, M10, M11-M14, M20-M25, M30-M36, M65-M79 |                           |
| Arthritis - Rheumatoid arthritis [2]                                                                                                                                                                                     | 714                                                                                                 | M05-M06                                               |                           |
| Asthma [3]                                                                                                                                                                                                               | 493                                                                                                 | J45                                                   |                           |
| (all) Cancers                                                                                                                                                                                                            | 140-239                                                                                             | C00-C26, C30-C44, C45-C97                             |                           |
| Cardiac Arrhythmia                                                                                                                                                                                                       | 427 (OHIP) / 427.3 (DAD)                                                                            | I48.0, I48.1                                          |                           |
| Congestive Heart Failure [4]                                                                                                                                                                                             | 428                                                                                                 | I500, I501, I509                                      |                           |
| Chronic Obstructive Pulmonary Disease [5]                                                                                                                                                                                | 491, 492, 496                                                                                       | J41, J43, J44                                         |                           |
| Coronary syndrome (excluding AMI)                                                                                                                                                                                        | 411-414                                                                                             | I20, I22-I25                                          |                           |
| Dementia [6]                                                                                                                                                                                                             | 290, 331 (OHIP) / 046.1, 290.0, 290.1, 290.2, 290.3, 290.4, 294, 331.0, 331.1, 331.5, F331.82 (DAD) | F00, F01, F02, F03, G30                               | Cholinesterase Inhibitors |
| Diabetes [7]                                                                                                                                                                                                             | 250                                                                                                 | E08-E13                                               |                           |
| Hypertension [8]                                                                                                                                                                                                         | 401, 402, 403, 404, 405                                                                             | I10, I11, I12, I13, I15                               |                           |
| Inflammatory Bowel Disease (IBD) [9]                                                                                                                                                                                     | 555,556                                                                                             | K50, K51                                              |                           |

|                                                            |                                                                                     |                                                                                                                                                                                                                                                                                                                                                                                                                                                                                                                                       |  |
|------------------------------------------------------------|-------------------------------------------------------------------------------------|---------------------------------------------------------------------------------------------------------------------------------------------------------------------------------------------------------------------------------------------------------------------------------------------------------------------------------------------------------------------------------------------------------------------------------------------------------------------------------------------------------------------------------------|--|
| (Other) Mental Illnesses                                   | 291, 292, 295, 297, 298, 299, 301, 302, 303, 304, 305, 306, 307, 313, 314, 315, 319 | F04, F050, F058, F059, F060, F061, F062, F063, F064, F07, F08, F10, F11, F12, F13, F14, F15, F16, F17, F18, F19, F20, F21, F22, F23, F24, F25, F26, F27, F28, F29, F340, F35, F36, F37, F430, F439, F453, F454, F458, F46, F47, F49, F50, F51, F52, F531, F538, F539, F54, F55, F56, F57, F58, F59, F60, F61, F62, F63, F64, F65, F66, F67, F681, F688, F69, F70, F71, F72, F73, F74, F75, F76, F77, F78, F79, F80, F81, F82, F83, F84, F85, F86, F87, F88, F89, F90, F91, F92, F931, F932, F933, F938, F939, F94, F95, F96, F97, F98 |  |
| Mood, anxiety, depression and other nonpsychotic disorders | 296, 300, 309, 311                                                                  | F30, F31, F32, F33, F34 (excl. F34.0), F38, F39, F40, F41,                                                                                                                                                                                                                                                                                                                                                                                                                                                                            |  |

|                                              |                               |                                                                                   |  |
|----------------------------------------------|-------------------------------|-----------------------------------------------------------------------------------|--|
|                                              |                               | F42, F43.1, F43.2, F43.8, F44, F45.0, F45.1, F45.2, F48, F53.0, F68.0, F93.0, F99 |  |
| Osteoporosis                                 | 733                           | M81, M82                                                                          |  |
| Renal failure                                | 403, 404, 584, 585, 586, v451 | N17, N18, N19, T82.4, Z49.2, Z99.2                                                |  |
| Stroke (excluding transient ischemic attack) | 430, 431, 432, 434, 436       | I60, I64                                                                          |  |

NOTES:

- Abbreviations: DAD=Discharge Abstract Database; ICD = International Classification of Disease; ODB = Ontario Drug Benefit Claims database; OHIP = Ontario Health Insurance Plan Claims Database
- All available health administrative data (OHIP, DAD, ODB) prior to index is used to ascertain disease status, with the exception of AMI (1 year prior to index), Cancer (2 years), Mood Disorder (2 years) and Other Mental Illnesses (2 years) as these conditions are considered episodic
- \*ODB prescription drug records are not available for the majority of persons under the age of 65
- AMI, Asthma, COPD, CHF, Dementia, Diabetes, Hypertension, IBD, and Rheumatoid Arthritis are based on validated case algorithms/ ICES cohorts (see 1-9 below, respectively). All other conditions required at least one diagnosis code recorded in acute care (DAD) or two diagnosis codes recorded in physician billings (OHIP) within a two-year period.

References:

1. Austin PC, Daly PA, Tu JV. A multicenter study of the coding accuracy of hospital discharge administrative data for patients admitted to cardiac care units in Ontario. *American Heart Journal* 2002;144:290–6.
2. Widdifield J, Bernatsky S, Paterson JM, Tu K, Ng R, Thorne JC, Pope JE, Bombardier C. Accuracy of Canadian health administrative databases in identifying patients with rheumatoid arthritis: a validation study using the medical records of rheumatologists. *Arthritis Care Res* 2013; 65(10): 1582-1591.
3. Gershon AS, Wang C, Guan J, Vasilevska-Ristovska J, Cicutto L, To T. Identifying patients with physician-diagnosed asthma in health administrative databases. *Can Respir J* 2009;16:183–8.
4. Schultz SE, Rothwell DM, Chen Z, Tu K. Identifying cases of congestive heart failure from administrative data: a validation study using primary care patient records. *Chronic Diseases and Injuries in Canada* 2013;33:160–6.

5. Gershon AS, Wang C, Guan J, Vasilevska-Ristovska J, Cicutto L, To T. Identifying Individuals with Physician Diagnosed COPD in Health Administrative Databases. *Copd* 2009;6:388–94.
6. Jaakkimainen RL, Bronskill SE, Tierney MC, Herrmann N, Green D, Young J, et al. Identification of Physician-Diagnosed Alzheimer’s Disease and Related Dementias in Population-Based Administrative Data: A Validation Study Using Family Physicians’ Electronic Medical Records. *J Alzheimers Dis.*; 2016 Aug 10;54(1):337–49
7. Hux JE, Ivis F, Flintoft V, Bica A. Diabetes in Ontario: Determination of prevalence and incidence using a validated administrative data algorithm. *Diabetes Care* 2002;25:512–6.
8. Tu K, Campbell NR, Chen ZL, Cauch-Dudek KJ, McAlister FA. Accuracy of administrative databases in identifying patients with hypertension. *Open Med* 2007;1:e18–26.
9. Benchimol EI, Guttman A, Mack DR, Nguyen GC, Marshall JK, Gregor JC, Wong J, Forster AJ, Manuel D. Validation of international algorithms to identify adults with inflammatory bowel disease in health administrative data from Ontario, Canada, *J Clin Epidemiol.* 2014; 67(8):887-96
